# Supplementary material for: Second language processing of English past tense morphology: The role of working memory
Source: publisher site journal article supplement (doi:10.1515/iral-2019-0005), 2020-09-01
Supplement: Supplementary file 1 [file j_iral-2019-0005_suppl.docx]

APPENDIX

**Experimental Items**

|  | Identity Prime | Test Prime | Unrelated Prime | TARGET |
| --- | --- | --- | --- | --- |
| 1 | fill | filled | strike | FILL |
| 2 | lock | locked | search | LOCK |
| 3 | raise | raised | create | RAISE |
| 4 | reach | reached | intend | REACH |
| 5 | serve | served | climb | SERVE |
| 6 | kick | kicked | spread | KICK |
| 7 | touch | touched | freeze | TOUCH |
| 8 | sign | signed | prefer | SIGN |
| 9 | pass | passed | treat | PASS |
| 10 | drop | dropped | breathe | DROP |
| 11 | change | changed | marry | CHANGE |
| 12 | seem | seemed | begin | SEEM |
| 13 | pull | pulled | decide | PULL |
| 14 | save | saved | carry | SAVE |
| 15 | check | checked | escape | CHECK |
| 16 | walk | walked | accept | WALK |
| 17 | pick | picked | prove | PICK |
| 18 | knock | knocked | appear | KNOCK |
| 19 | build | built | split | BUILD |
| 20 | steal | stole | share | STEAL |
| 21 | grow | grew | ruin | GROW |
| 22 | teach | taught | settle | TEACH |
| 23 | blow | blew | vote | BLOW |
| 24 | fall | fell | grab | FALL |
| 25 | sell | sold | dare | SELL |
| 26 | spend | spent | smoke | SPEND |
| 27 | wake | woke | drag | WAKE |
| 28 | wear | wore | deny | WEAR |
| 29 | catch | caught | swear | CATCH |
| 30 | drive | drove | scare | DRIVE |
| 31 | write | wrote | offer | WRITE |
| 32 | break | broke | paint | BREAK |
| 33 | throw | threw | wash | THROW |
| 34 | fight | fought | borrow | FIGHT |
| 35 | stand | stood | exist | STAND |
| 36 | sleep | slept | shake | SLEEP |
